# Supplementary material for: N-doped TiO2 nanotube arrays with uniformly embedded CoxP nanoparticles for high-efficiency hydrogen evolution reaction
Source: Royal Society of Chemistry journal article supplement (doi:10.1039/c9ra01184f), 2019-01-01
Supplement: c9ra01184f1.pdf [file c9ra01184f1.pdf]

# **N-Doped TiO<sub>2</sub> Nanotube Arrays with Uniformly Embedded Co<sub>x</sub>P Nanoparticles for High-Efficiency Hydrogen Evolution Reaction**

Yong Wei,<sup>a</sup> Jijiang Fu,<sup>a</sup> Hao Song,<sup>a,b</sup> Ben Zhang,<sup>a</sup> Chaoran Pi,<sup>a</sup> Lu Xia,<sup>a</sup> Xuming  
Zhang,<sup>a\*</sup> Biao Gao,<sup>a,b</sup> Yang Zheng,<sup>a\*</sup> and Paul K. Chu<sup>b</sup>

<sup>a</sup> The State Key Laboratory of Refractories and Metallurgy and Institute of Advanced  
Materials and Nanotechnology, Wuhan University of Science and Technology, Wuhan  
430081, China

<sup>b</sup> Department of Physics and Department of Materials Science and Engineering, City  
University of Hong Kong, Tat Chee Avenue, Kowloon, Hong Kong, China

\*Corresponding authors: E-mail: xumzhang@wust.edu.cn (X.M. Zhang),  
yzheng@wust.edu.cn (Y. Zheng)

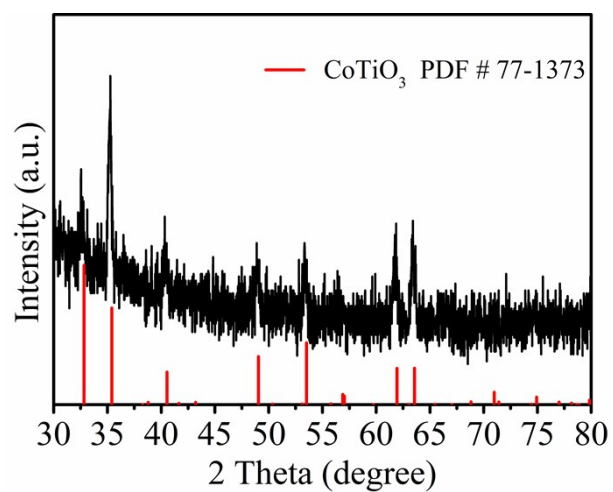

**Fig. S1** The glancing angle XRD pattern of as-hydrothermal CoTiO<sub>3</sub> NTAs after annealing at 750 °C for 3h in air.

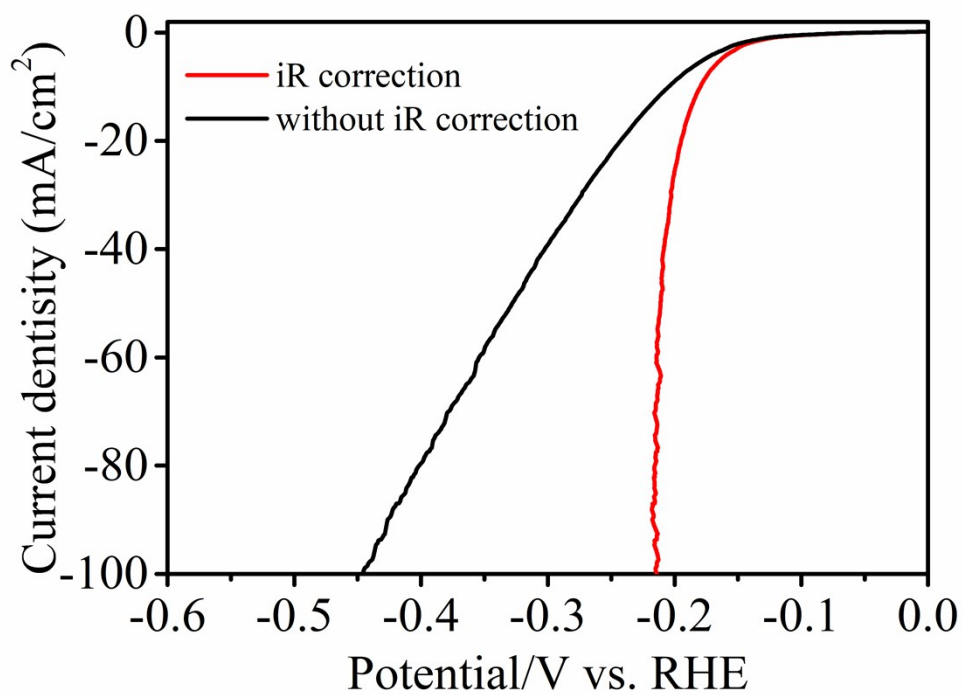

**Fig. S2** Polarization curves of Co<sub>x</sub>P/N-TiO<sub>2</sub> NTAs-300 with and without *iR* correction.

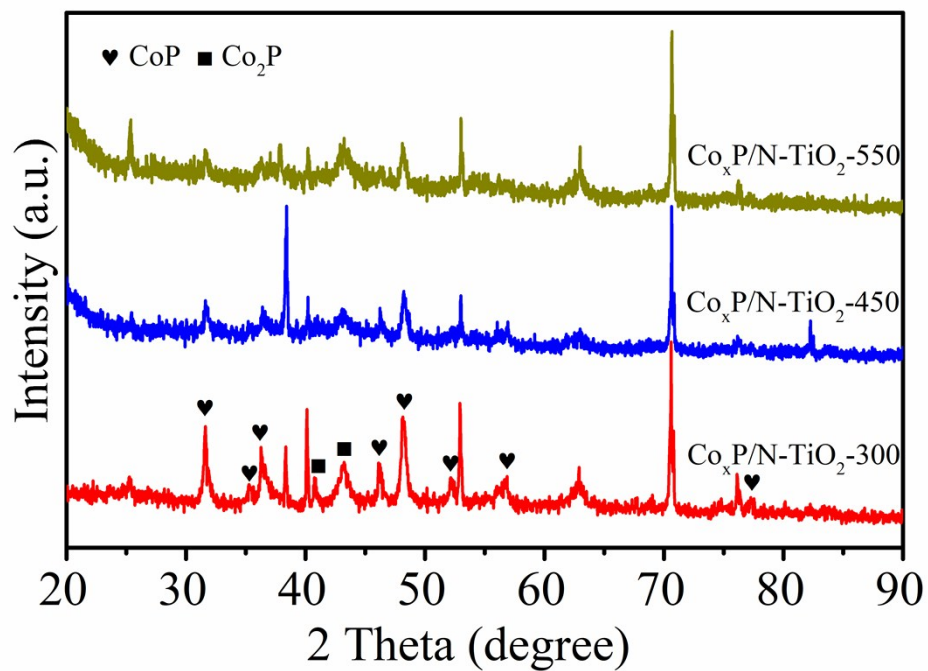

**Fig S3** The XRD patterns of  $\text{Co}_x\text{P/N-TiO}_2$  NTAs after phosphorization at 300 °C, 450 °C and 550 °C, respectively.

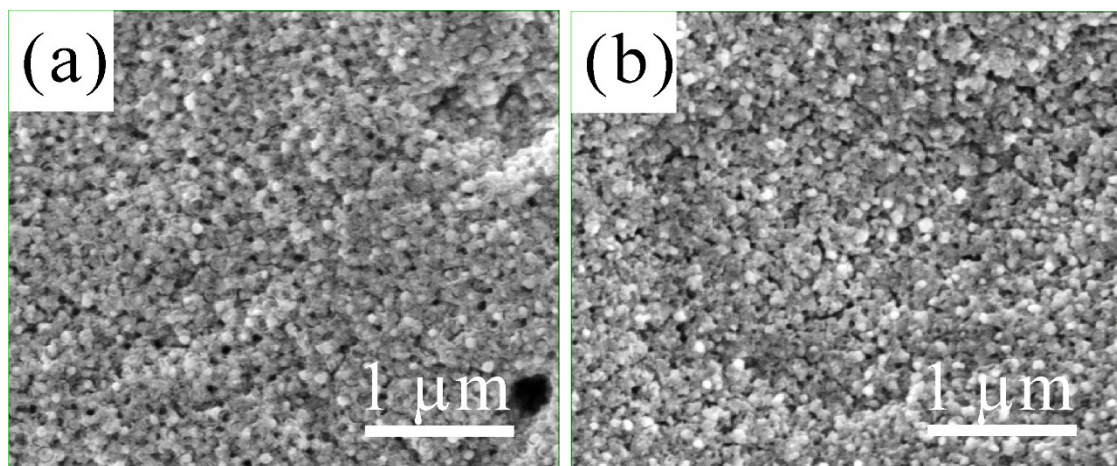

**Fig. S4** SEM images of  $\text{Co}_x\text{P/N-TiO}_2$  after phosphorization at (a) 450 °C and (b) 550 °C, respectively.

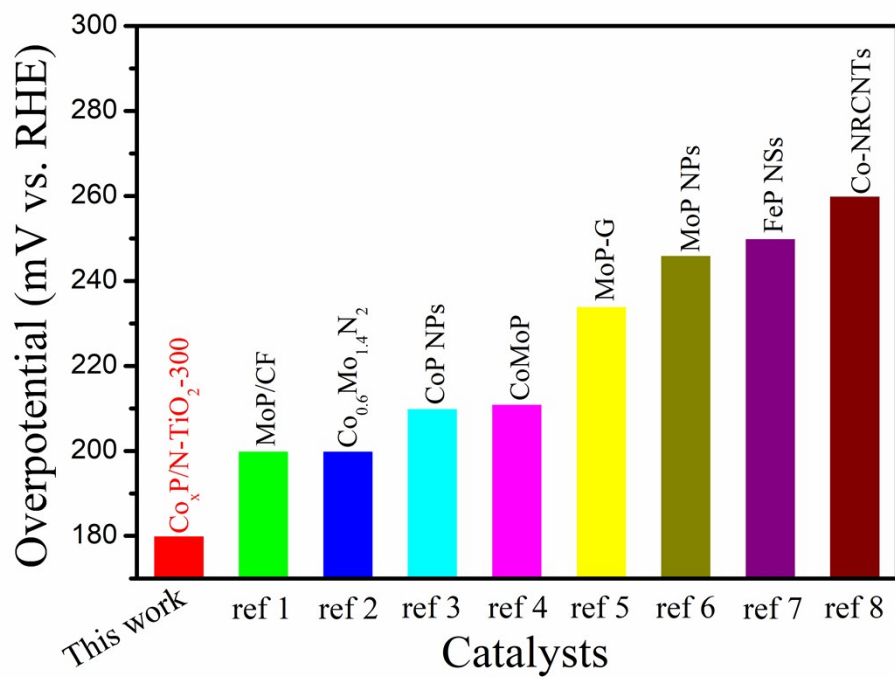

**Fig. S5** Summarized overpotentials at 10 mA cm<sup>-2</sup> for other catalysts in 0.5 M H<sub>2</sub>SO<sub>4</sub>.

---

## References

- 1 W. Cui, Q. Liu, Z. Xing, A.M. Asiri, K.A. Alamry and X. Sun, *Appl. Catal. B*, 2015, 164, 144-150.
- 2 B. Cao, G. M. Veith, J. C. Neufeind, R. R. Adzic and P. G. Khalifah, *J. Am. Chem. Soc.*, 2015, 51, 19186-19192.
- 3 D. Wang, D. Zhang, C. Tang, P. Zhou, Z. Wu and B. Fang, *Catal. Sci. Technol.*, 2016, 6, 1952-1956.
- 4 P. Jiang, Q. Liu, C. Ge, W. Cui, Z. Pu, A. M. Asiri and X. Sun, *J. Mater. Chem. A*, 2014, 2, 14634-14640.
- 5 S. S. J. Aravind, K. Ramanujachary, A. Mugweru and T. D. Vaden, *Appl. Catal. A*, 2015, 490, 101-107.
- 6 X. Chen, D. Wang, Z. Wang, P. Zhou, Z. Wu and F. Jiang, *Chem. Commun.*, 2014, 50, 11683-11685.
- 7 Y. Xu, R. Wu, J. Zhang, Y. Shi and B. Zhang, *Chem. Commun.*, 2013, 49, 6656-6658.
- 8 X. Zou, X. Huang, A. Goswami, R. Silva, B. R. Sathe, E. Mikmekova and T. Asefa, *Angew. Chem. Int. Ed.*, 2014, 53, 4372-4376.
